# Supplementary material
Source: PubMed Central journal article supplement (PMC2668851)
Supplement: blood-2008-12-180646_1.pdf [file blood-2008-12-180646_1.pdf]

| DC subset            | Specific markers                                                                                                         | Sensitivity to $\gamma$ -irradiation | Method                                                                                                                                                                                                                                   | Turnover                                                                                                                                                                                                                                                                                                                                                                                                                                                                                                                                                                                                                                                                      |
|----------------------|--------------------------------------------------------------------------------------------------------------------------|--------------------------------------|------------------------------------------------------------------------------------------------------------------------------------------------------------------------------------------------------------------------------------------|-------------------------------------------------------------------------------------------------------------------------------------------------------------------------------------------------------------------------------------------------------------------------------------------------------------------------------------------------------------------------------------------------------------------------------------------------------------------------------------------------------------------------------------------------------------------------------------------------------------------------------------------------------------------------------|
| <b>Spleen pDC</b>    | MHC II <sup>+</sup> CD11c <sup>int</sup><br>PDCA1 <sup>+</sup> CD11b <sup>-</sup><br>B220 <sup>+</sup> Gr-1 <sup>+</sup> | Radiosensitive                       | <b>% cells in cycle</b><br><br><b>Parabiosis</b><br>% exchange<br>Time of repopulation upon separation                                                                                                                                   | 0.3% <sup>1</sup><br><br>16% exchange at 30 days.<br>3 days <sup>1</sup>                                                                                                                                                                                                                                                                                                                                                                                                                                                                                                                                                                                                      |
| <b>Spleen DCs</b>    |                                                                                                                          | Radiosensitive                       | <b>% cells in cycle</b><br><br><b>Parabiosis</b><br>% exchange<br>Time of repopulation upon separation<br><br><b>Time of repopulation after toxin administration**</b>                                                                   | 5% <sup>1,2</sup><br><br>29% exchange at 30 days.<br>2 weeks <sup>1</sup><br><br>6 days <sup>3</sup>                                                                                                                                                                                                                                                                                                                                                                                                                                                                                                                                                                          |
| CD8 <sup>+</sup> DCs | Langerin <sup>+</sup> CD205 <sup>+</sup><br>CD11b <sup>-</sup>                                                           | Radiosensitive                       | <b>BrdU</b> : 50% labeling                                                                                                                                                                                                               | 1.5 days <sup>4</sup>                                                                                                                                                                                                                                                                                                                                                                                                                                                                                                                                                                                                                                                         |
| CD4 <sup>+</sup> DCs | Langerin <sup>-</sup> DCIR2 <sup>+</sup><br>CD11b <sup>+</sup>                                                           | Radiosensitive                       | <b>BrdU</b> : 50% labeling                                                                                                                                                                                                               | 2.9 days <sup>4</sup>                                                                                                                                                                                                                                                                                                                                                                                                                                                                                                                                                                                                                                                         |
| <b>Thymic DCs</b>    | CD8 $\alpha$ <sup>+</sup> DCs                                                                                            | Radiosensitive                       | <b>BrdU</b> : 50% labeling<br><br><b>Parabiosis</b><br>% exchange                                                                                                                                                                        | Biphasic: one population turnover in 3 days one population turnover in 10 days <sup>4</sup><br><br>Heterogenous exchange: One DC population exchange poorly (10% at 5 weeks ) one population including CD8 $\alpha$ <sup>+</sup> and CD8 $\alpha$ <sup>-</sup> DCs exchange largely (50% at 8 weeks).                                                                                                                                                                                                                                                                                                                                                                         |
| <b>Peripheral LN</b> | MHC II <sup>+</sup> CD11c <sup>+</sup><br>cells (includes resident DCs and migratory DCs ).                              | Radiosensitive                       | <b>% cells in cycle</b><br><br><b>BrdU : 50% labeling</b><br><br><b>Parabiosis</b><br>% exchange<br>Time of repopulation upon separation                                                                                                 | 5% <sup>1</sup><br><br>3 days (except for cutaneous LN DCs: 12.5% DCs labeled in 3 days due to the presence of long lived LCs) <sup>4</sup><br><br>29% exchange at 30 days.<br>2 weeks <sup>1</sup>                                                                                                                                                                                                                                                                                                                                                                                                                                                                           |
| Epidermal LCs        | Langerin <sup>+</sup> MHC II <sup>+</sup><br>CD11c <sup>lo</sup> CD11b <sup>+</sup><br>F4/80 <sup>+</sup>                | Radioresistant in mice <sup>5</sup>  | <b>% cell in cycle</b><br><br><b>Parabiosis</b><br>% exchange<br><br><b>BrdU</b><br><br><b>Time of repopulation after elimination in situ (Lethal irradiation and BM transplantation)</b><br><br><b>Human allogeneic transplantation</b> | 2-3% DC are cycling. Evidence for self renewal <sup>5</sup><br><br>No exchange at 6 months <sup>5</sup><br><br>30-40% labeling in 3 weeks <sup>6,7</sup><br><br>Intravital imaging to measure influx or efflux of EGFP MHC II <sup>+</sup> cells. LC half life: 53-78 days <sup>8</sup><br><br>30-50% elimination in 7 days after x ray<br>Local repopulation in 4 weeks , independent of circulating cells.<br><br>Human LCs persist for more than a year in a limb graft <sup>9</sup><br>Human host LCs remain in the skin of patients more than a month after allogeneic hematopoietic cell transplant despite complete donor-derived chimerism in the blood <sup>10</sup> |

| DC subset                          | Specific markers                                                                                                 | Sensitivity to $\gamma$ -irradiation              | Method                                                                                                                                                                             | Turnover                                                                                                                                                                                                                                                                                                  |
|------------------------------------|------------------------------------------------------------------------------------------------------------------|---------------------------------------------------|------------------------------------------------------------------------------------------------------------------------------------------------------------------------------------|-----------------------------------------------------------------------------------------------------------------------------------------------------------------------------------------------------------------------------------------------------------------------------------------------------------|
| Dermal DCs                         | Langerin <sup>-</sup> CD103 <sup>-</sup> CD11b <sup>+</sup> (80% total dermal DCs)                               | Radiosensitive (20% radioresistant) <sup>11</sup> | <b>% cells in cycle</b><br><br><b>Parabiosis</b><br>% exchange<br><br><b>BrdU</b><br><br><b>Human allogeneic transplantation</b>                                                   | 2-3% DCs are cycling.<br><br>20% exchange at 6 months <sup>11</sup><br><br>60% labeling in 3 weeks <sup>11</sup><br><br>Human host dermal DCs remain in the skin of patients one month after allogeneic hematopoietic cell transplant despite complete donor-derived chimerism in the blood <sup>11</sup> |
|                                    | Langerin <sup>+</sup> CD103 <sup>+</sup> (20% total dermal DCs)                                                  | Radiosensitive <sup>12-14</sup>                   | <b>% cells in cycle</b><br><br><b>Time of repopulation after toxin injection**</b>                                                                                                 | 3-4% <sup>12</sup><br><br>5 days <sup>12</sup>                                                                                                                                                                                                                                                            |
| <b>Airway epithelial DCs (Rat)</b> | Langerin <sup>+</sup> CD103 <sup>+</sup> <sup>15</sup>                                                           | Radiosensitive <sup>16</sup>                      | <b>Time of repopulation Lethal irradiation and congenic BM transplantation)</b>                                                                                                    | 80% disappear by day 3 (20% remain)<br>7-10 days <sup>16</sup>                                                                                                                                                                                                                                            |
| <b>Intestinal DCs</b>              | CD103 <sup>+</sup> and CD103 <sup>-</sup> DCs                                                                    | ?                                                 | Thymidine injection in mesenteric lymphadenectomised rats                                                                                                                          | Labeled DCs appear in 3 days in the thoracic duct in <sup>17</sup>                                                                                                                                                                                                                                        |
| <b>Vaginal DCs</b>                 | langerin <sup>+</sup> <sup>18 19</sup><br><sup>20</sup><br><sup>21</sup>                                         | Radiosensitive <sup>18</sup>                      | <b>BrdU : 50% labeling</b><br><br><b>Time of repopulation after Lethal irradiation and congenic BM transplantation)</b><br><br><b>Time of repopulation after toxin injection**</b> | 6 days <sup>18</sup><br><br>13 days <sup>18</sup><br><br>10 days <sup>18</sup>                                                                                                                                                                                                                            |
| <b>Kidney DCs (Rat)</b>            | Langerin <sup>-</sup> CD103 <sup>-</sup> CD11b <sup>+</sup> DCs and Langerin <sup>+</sup> CD103 <sup>+</sup> DCs | Radiosensitive                                    | <b>Time of repopulation after Lethal irradiation and BM transplantation</b>                                                                                                        | 7-20 days <sup>22</sup>                                                                                                                                                                                                                                                                                   |
| <b>Heart DCs (Rat)</b>             |                                                                                                                  | Radiosensitive                                    | <b>Time of repopulation after Lethal irradiation and BM transplantation</b>                                                                                                        | 10-25 days <sup>23,24</sup>                                                                                                                                                                                                                                                                               |
