# Supplementary material
Source: PubMed Central journal article supplement (PMC2668851)
Supplement: blood-2008-12-180646_2.pdf [file blood-2008-12-180646_2.pdf]

| Cytokine            | knockout                                   | BM DC progenitors | Spleen pDC                      | Spleen DC                       | Tissue/Dermal DC | LC     | Citation                                                         |
|---------------------|--------------------------------------------|-------------------|---------------------------------|---------------------------------|------------------|--------|------------------------------------------------------------------|
| <b>GM-CSF</b>       | GM-CSF <sup>-/-</sup>                      | 0.6–0.8           | 1                               | 0.6–0.8                         | 0.8              | 0.6    | <sup>25</sup> , Kingston and Manz unpublished                    |
|                     | GM-CSFR <sup>-/-</sup>                     | n.a.              | n.a.                            | 1                               | n.a.             | n.a.   | <sup>25</sup>                                                    |
|                     | GM-CSF injection                           | n.a.              | n.a.                            | 1                               | n.a.             | n.a.   | <sup>26</sup>                                                    |
|                     | GM-CSF transgenic                          | n.a.              | n.a.                            | 1.5                             | n.a.             | n.a.   | <sup>25</sup>                                                    |
|                     | pegGM-CSF injection                        | n.a.              | n.a.                            | 7–12                            | n.a.             | n.a.   | <sup>27,28</sup>                                                 |
|                     | GM-CSF transient expr.                     | n.a.              | n.a.                            | 200                             | n.a.             | n.a.   | <sup>29</sup>                                                    |
| <b>Flt3L</b>        | Flt3 <sup>-/-</sup>                        | 1                 | 0.65                            | 0.43                            | n.a.             | n.a.   | <sup>30</sup> , Kingston and Manz, Ginhoux and Merad unpublished |
|                     | Flt3L <sup>-/-</sup>                       | 0.3–0.7           | 0.1                             | 0.1                             | 0.5              | 0.8    | <sup>31</sup> , Kingston and Manz unpublished                    |
|                     | Flt3L injection                            | 2.5–10            | 28                              | 9–30×                           | n.a.             | n.a.   | <sup>26,32 30,33,34 27,28</sup>                                  |
|                     | Flt3L expr.                                | n.a.              | >10                             | >10                             | >10              | n.a.   | <sup>35 36</sup> ,                                               |
|                     | Flt3 sign. inhib.                          | n.a.              | 0.1                             | 0.1                             | n.a.             | n.a.   | <sup>37</sup>                                                    |
| <b>Flt3L+GM-CSF</b> | Flt3 <sup>-/-</sup> GM-CSFR <sup>-/-</sup> | n.a.              | 0.65 (*as flt3 <sup>-/-</sup> ) | 0.43 (*as flt3 <sup>-/-</sup> ) | n.a.             | n.a.   | <sup>30</sup>                                                    |
|                     | Flt3L <sup>-/-</sup> GM-CSF <sup>-/-</sup> | 0.15–0.25         | 0.1                             | 0.1                             | 0.25             | 0.8    | Kingston and Manz unpublished                                    |
| <b>M-CSF</b>        | M-CSF <sup>-/-</sup> (op/op)               | n.a.              | 0.3                             | 0.6–1                           | n.a.             | 0.8?–1 | <sup>38–40</sup>                                                 |
|                     | M-CSFR <sup>-/-</sup>                      | n.a.              | 1                               | 1                               | n.a.             | absent | <sup>41</sup>                                                    |
|                     | M-CSF injection                            | n.a.              | 2.5                             | 2.5                             | n.a.             | n.a.   | <sup>42</sup>                                                    |
| <b>TGFβ</b>         | TGFβ1 <sup>-/-</sup>                       | n.a.              | n.a.                            | 1                               | n.a.             | absent | <sup>43,44</sup>                                                 |

Numbers indicate approximate fold of wild-type, n.a. (not available)
